# Supplementary material
Source: Springer Nature journal article supplement (https://www.springermedizin.de/resource/supplementary/12978_2013_214_MOESM2_ESM.pdf/9602260)
Supplement: MOESM2 [file 9602260]

**Records identified through  
database searching (N=1168)**

**Records eliminated (N=1045)**

Not relevant, no data, conducted in  
Western setting, duplicates

**Records Selected  
for Full Review  
(N=123)**

**Records identified  
through hand  
searching of  
references (N=43)**

**Records eliminated (N=93)**

22 conducted outside Sub-Saharan  
Africa, 19 place of delivery not primary  
outcome, 35 no original data, 12 used  
primarily qualitative methodology, 4 not  
peer-reviewed, 4 not available

**Final Sample  
(N=65)**
